# Supplementary material for: Deciphering pathological remodelling of the human cartilage extracellular matrix in osteoarthritis at the supramolecular level
Source: Royal Society of Chemistry journal article supplement (doi:10.1039/d2nr00474g), 2022-01-01
Supplement: d2nr00474g1.pdf [file d2nr00474g1.pdf]

# **Deciphering pathological remodelling of the human cartilage extracellular matrix in osteoarthritis at the supramolecular level**

## *Electronic Supplementary Material*

Ilhem Lilia Jaabar, Pauline Cornette, Antoine Miche, Kristell Wanherdrick, Vincent Dupres, François-Paul Ehkirch, Francis Berenbaum, Xavier Houard, Jessem Landoulsi

### **Content**

#### **S1. XPS data**

##### **S1.1. Analysis depth**

##### **S1.2. Spectral components and chemical functions**

##### **S1.3. Elemental composition**

#### **S2. Concentrations of elements and chemical functions expected for ECM main compounds**

##### **S2.1. Type II collagen**

##### **S2.2. FACIT type IX collagen**

##### **S2.3. Aggrecan**

###### **S2.3.1. Sulphated GAG**

###### **S2.3.2. Core protein**

##### **S2.4. Hyaluronic acid**

#### **S3. Molar concentration ratios computed on the basis of amino acid amount and composition of ECM main compounds**

#### **S4. OA samples scoring**

#### **S5. AFM data**

#### **S6. XPS data**

#### **S7. Nanomechanical properties**

#### **S8. Collagen II/IX/XI heterofibril**

#### **References**

## S1. XPS data

### S1.1. Analysis depth

XPS probes a thickness of only few nanometres. In fact, an electron photoemitted at depth  $z$  in a flat and smooth solid in a direction making the angle  $\theta$  with the normal to the surface of the solid has a probability  $Q$  to leave the solid in this direction without energy loss:  $Q = \exp(-z / \lambda \cos\theta)$  where  $z / \cos\theta$  is the distance  $d$  travelled by the photoelectron in the solid and  $\lambda$  is the inelastic mean free path (IMFP), i.e. the average distance between inelastic collisions ( $\lambda = -dd/dQ$ ). The IMFP depends on the kinetic energy of the photoemitted electron and on the properties of the matrix, particularly its density. The contribution to the intensity decreases exponentially with the depth: 95 % from a layer of thickness  $3\lambda \cos\theta$  [1].

IMFP values were calculated according to Tanuma et al. [2] using the Quases program [3] using the parameters given in Table S1. These calculations lead to the values detailed in Table S2. The thickness probed by XPS for each cryo-sectioned sample is thus around 5.5 nm.

**Table S1.** Parameters used for the calculation of the electron inelastic mean free path (IMFP). (Abbreviations. Col: collagen, Agg: aggrecan, HA: hyaluronic acid and HC: hydrocarbon

| Quases program input data                            | Col    | Agg     | HA     | HC     |
|------------------------------------------------------|--------|---------|--------|--------|
| Carbon quantity                                      | 12321  | 65800   | 14     | 1      |
| Mw (g/mol)                                           | 289639 | 2421399 | 379    | 14     |
| Carbon concentration (mol/g)                         | 0.043  | 0.027   | 0.037  | 0.071  |
| Density (g/cm <sup>3</sup> )                         | 1.4    | 1.5     | 1.5    | 0.9    |
| Valence electrons                                    | 113043 | 173     | 148    | 6      |
| C <sub>C</sub> <sup>ECM</sup> (mol/cm <sup>3</sup> ) | 0.0596 | 0.0408  | 0.0554 | 0.0643 |
| C <sup>ECM</sup> (mol/cm <sup>3</sup> )              | 0.055  |         |        |        |

compounds)

**Table S2.** Computation of the electron inelastic mean free path (IMFP).

| Energy Gap (eV)                                        |                      | 2   | 4   | 6    | 8    | $\lambda_{\text{mov}}^{\text{Matrix}}$ |
|--------------------------------------------------------|----------------------|-----|-----|------|------|----------------------------------------|
| Col                                                    | $\lambda_{\text{C}}$ | 3.3 | 3.4 | 3.6  | 4.0  | 3.6                                    |
|                                                        | $\lambda_{\text{N}}$ | 3.0 | 3.2 | 3.4  | 3.7  | 3.3                                    |
| Agg                                                    | $\lambda_{\text{C}}$ | 3.3 | 3.4 | 3.6  | 3.9  | 3.5                                    |
|                                                        | $\lambda_{\text{N}}$ | 3.0 | 3.2 | 3.3  | 3.6  | 3.3                                    |
| HA                                                     | $\lambda_{\text{C}}$ | 3.3 | 3.4 | 3.7  | 4.0  | 3.6                                    |
|                                                        | $\lambda_{\text{N}}$ | 3.1 | 3.2 | 3.4  | 3.7  | 3.3                                    |
| Others                                                 | $\lambda_{\text{C}}$ | 3.3 | 3.5 | 3.8  | 4.2  | 3.7                                    |
|                                                        | $\lambda_{\text{N}}$ | 3.1 | 3.2 | 3.5  | 3.9  | 3.4                                    |
| $\lambda_{\text{mov}}^{\text{Org}}$ (nm)               |                      | 3.2 | 3.3 | 3.5  | 3.9  | 3.5                                    |
| $3\lambda_{\text{mov}}^{\text{Org}}$ (nm)              |                      | 9.5 | 9.9 | 10.6 | 11.6 | 10.4                                   |
| $3\lambda_{\text{mov}}^{\text{Org}} \cos(\theta)$ (nm) |                      | 5.0 | 5.2 | 5.6  | 6.1  | 5.5                                    |

## S1.2. Spectral components and chemical functions

**Table S3.** Characteristics and assignment of XPS peaks components for human cartilage samples.

| Peak | Binding energy (eV) | Functional groups                          |                                     |
|------|---------------------|--------------------------------------------|-------------------------------------|
| C 1s | 284.8 * †           | <u>C</u> -(C,H)                            | hydrocarbon                         |
|      | 286.1 ± 0.2 †       | <u>C</u> -(O,N)                            | alcohol, ether, ester, amide, amine |
|      | 287.5 ± 0.3 †       | O- <u>C</u> -O                             | acetal, hemiacetal                  |
|      |                     | C-( <u>C</u> =O)-N                         | amide                               |
|      | 288.9 ± 0.2 †       | C-( <u>C</u> =O)-O                         | carboxylic acid, ester              |
| N 1s | 399.8 ± 0.1         | (C=O)- <u>N</u> H                          | amine / amide                       |
|      | 401.5 ± 0.4         | C-( <u>N</u> H <sub>3</sub> <sup>+</sup> ) | protonated amine                    |
|      | 402.4 ± 0.3         | R <sub>4</sub> - <u>N</u> <sup>+</sup>     | quaternary amine                    |
| S 2p | 163.7 ± 0.3 §       | R- <u>S</u> - <u>S</u> -R'                 | protein disulfide bond              |
|      | 168.6 ± 0.3 §       | <u>S</u> O <sub>4</sub> <sup>2-</sup>      | sulfate                             |

\* Component fixed at 284.8 eV and used for referencing XPS peaks.

† Components imposed to have the same FWHM, found in the range of 1.1 to 1.6 eV.

§ Component <sup>3/2</sup>

### S1.3. Elemental composition

**Table S4.** Elemental composition measured by XPS on treated cartilages. Molar concentrations over all elements except hydrogen. (bdl: below the detect limit)

| <b>Treatment</b>  | <b>Analysed zone</b> | <b>C</b> | <b>N</b> | <b>O</b> | <b>S</b> | <b>Si</b> | <b>Zn</b> | <b>Na</b> | <b>Ca</b> | <b>P</b> |
|-------------------|----------------------|----------|----------|----------|----------|-----------|-----------|-----------|-----------|----------|
| <b>NF</b>         | A                    | 73.00    | 1.91     | 24.43    | 0.40     | 0.23      | 0.02      | 0.01      | bdl       | bdl      |
|                   | B                    | 71.09    | 6.62     | 20.72    | 1.06     | 0.22      | bdl       | 0.24      | 0.05      | bdl      |
|                   | C                    | 67.70    | 9.45     | 20.35    | 1.20     | 0.65      | bdl       | 0.55      | 0.10      | bdl      |
| <b>F</b>          | A                    | 69.46    | 0.37     | 29.11    | 0.07     | 0.77      | 0.07      | 0.15      | bdl       | bdl      |
|                   | B                    | 70.39    | 2.56     | 25.87    | 0.27     | 0.65      | 0.03      | 0.21      | 0.02      | bdl      |
|                   | C                    | 67.39    | 7.02     | 23.51    | 0.59     | 0.82      | 0.02      | 0.55      | 0.10      | bdl      |
| <b>F – Pa</b>     | A                    | 79.16    | 5.52     | 14.06    | 0.52     | 0.37      | bdl       | 0.07      | 0.22      | 0.08     |
|                   | B                    | 80.42    | 4.25     | 13.54    | 0.50     | 1.00      | bdl       | 0.05      | 0.22      | 0.02     |
|                   | C                    | 84.69    | 2.33     | 10.54    | 0.36     | 1.90      | bdl       | 0.03      | 0.15      | bdl      |
| <b>F – d</b>      | A                    | 79.98    | 4.64     | 14.19    | 0.42     | 0.42      | 0.01      | 0.34      | bdl       | bdl      |
|                   | B                    | 86.03    | 1.70     | 11.23    | 0.18     | 0.69      | 0.04      | 0.13      | bdl       | bdl      |
|                   | C                    | 72.01    | 2.01     | 18.56    | 0.18     | 6.79      | 0.15      | 0.30      | bdl       | bdl      |
| <b>F – d – us</b> | A                    | 66.33    | 10.63    | 20.54    | 1.19     | 0.29      | bdl       | 1.02      | bdl       | bdl      |
|                   | B                    | 67.28    | 8.38     | 21.18    | 1.40     | 0.91      | 0.03      | 0.82      | bdl       | bdl      |
|                   | C                    | 74.98    | 2.41     | 20.09    | 0.57     | 1.76      | 0.04      | 0.15      | bdl       | bdl      |

## S2. Concentrations of elements and chemical functions expected for ECM main compounds

### S2.1. Type II collagen

**Table S5.** Elemental composition of type II collagen, computed from amino acid amounts and composition.

| amino acids                                                 | quantities  | AMINO ACID |    |   |   |   | ALPHA CHAIN  |             |             |             |           | TROPOCOLLAGEN |              |             |             |           |  |
|-------------------------------------------------------------|-------------|------------|----|---|---|---|--------------|-------------|-------------|-------------|-----------|---------------|--------------|-------------|-------------|-----------|--|
|                                                             |             | C          | H  | N | O | S | C            | H           | N           | O           | S         | C             | H            | N           | O           | S         |  |
| A                                                           | 108         | 3          | 7  | 1 | 2 |   | 324          | 756         | 108         | 216         |           | 972           | 2268         | 324         | 648         |           |  |
| D                                                           | 32          | 4          | 7  | 1 | 4 |   | 128          | 224         | 32          | 128         |           | 384           | 672          | 96          | 384         |           |  |
| E                                                           | 55          | 5          | 9  | 1 | 4 |   | 275          | 495         | 55          | 220         |           | 825           | 1485         | 165         | 660         |           |  |
| F                                                           | 15          | 9          | 11 | 1 | 2 |   | 135          | 165         | 15          | 30          |           | 405           | 495          | 45          | 90          |           |  |
| G                                                           | 352         | 2          | 5  | 1 | 2 |   | 704          | 1760        | 352         | 704         |           | 2112          | 5280         | 1056        | 2112        |           |  |
| H                                                           | 2           | 6          | 9  | 3 | 2 |   | 12           | 18          | 6           | 4           |           | 36            | 54           | 18          | 12          |           |  |
| I                                                           | 11          | 6          | 13 | 1 | 2 |   | 66           | 143         | 11          | 22          |           | 198           | 429          | 33          | 66          |           |  |
| K                                                           | 39          | 6          | 14 | 2 | 2 |   | 234          | 546         | 78          | 78          |           | 702           | 1638         | 234         | 234         |           |  |
| L                                                           | 28          | 6          | 13 | 1 | 2 |   | 168          | 364         | 28          | 56          |           | 504           | 1092         | 84          | 168         |           |  |
| M                                                           | 11          | 5          | 11 | 1 | 2 | 1 | 55           | 121         | 11          | 22          | 11        | 165           | 363          | 33          | 66          | 33        |  |
| N                                                           | 12          | 4          | 8  | 2 | 3 |   | 48           | 96          | 24          | 36          |           | 144           | 288          | 72          | 108         |           |  |
| P                                                           | 200         | 5          | 9  | 1 | 2 |   | 1000         | 1800        | 200         | 400         |           | 3000          | 5400         | 600         | 1200        |           |  |
| HYP                                                         | 29          | 5          | 10 | 1 | 3 |   | 145          | 290         | 29          | 87          |           | 435           | 870          | 87          | 261         |           |  |
| Q                                                           | 41          | 5          | 10 | 2 | 3 |   | 205          | 410         | 82          | 123         |           | 615           | 1230         | 246         | 369         |           |  |
| R                                                           | 54          | 6          | 14 | 4 | 2 |   | 324          | 756         | 216         | 108         |           | 972           | 2268         | 648         | 324         |           |  |
| S                                                           | 29          | 3          | 7  | 1 | 3 |   | 87           | 203         | 29          | 87          |           | 261           | 609          | 87          | 261         |           |  |
| T                                                           | 21          | 4          | 9  | 1 | 3 |   | 84           | 189         | 21          | 63          |           | 252           | 567          | 63          | 189         |           |  |
| V                                                           | 19          | 5          | 11 | 1 | 2 |   | 95           | 209         | 19          | 38          |           | 285           | 627          | 57          | 114         |           |  |
| Y                                                           | 2           | 9          | 11 | 1 | 3 |   | 18           | 22          | 2           | 6           |           | 54            | 66           | 6           | 18          |           |  |
| <b>TOTAL</b>                                                | <b>1060</b> |            |    |   |   |   | <b>4107</b>  | <b>8567</b> | <b>1318</b> | <b>2428</b> | <b>11</b> | <b>12321</b>  | <b>25701</b> | <b>3954</b> | <b>7284</b> | <b>33</b> |  |
| 1059 H <sub>2</sub> O removed during peptide bond formation |             |            |    |   |   |   |              |             |             |             |           |               |              |             |             |           |  |
|                                                             |             |            |    |   |   |   |              |             |             |             |           |               |              |             |             |           |  |
|                                                             |             |            |    |   |   |   |              |             |             |             |           |               |              |             |             |           |  |
| <b>total number of each element</b>                         |             |            |    |   |   |   | <b>4107</b>  | <b>6449</b> | <b>1318</b> | <b>1369</b> | <b>11</b> | <b>12321</b>  | <b>19347</b> | <b>3954</b> | <b>4107</b> | <b>33</b> |  |
| molar mass of each element (g/mol)                          |             |            |    |   |   |   | 12.01        | 1.01        | 14.01       | 16.00       | 32.06     | 12.01         | 1.01         | 14.01       | 16.00       | 32.06     |  |
| <b>M<sub>w</sub> (g/mol)</b>                                |             |            |    |   |   |   | <b>96546</b> |             |             |             |           | <b>289639</b> |              |             |             |           |  |

**Table S6.** Chemical functions in type II collagen (triple-helix) computed from composition (Uniprot) and pooled according to the expected contribution in XPS peaks: C 1s, O 1s and N1s.

| amino acids                    | TROPOCOLLAGEN   |                 |            |           |            |             |            |                   |            |                  |             |             |                  |             |            |              |             |                  |             |            |            |            |             |             |
|--------------------------------|-----------------|-----------------|------------|-----------|------------|-------------|------------|-------------------|------------|------------------|-------------|-------------|------------------|-------------|------------|--------------|-------------|------------------|-------------|------------|------------|------------|-------------|-------------|
|                                | CH <sub>3</sub> | CH <sub>2</sub> | CH         | CCC       | C-O        | C-N         | C-S        | N-C=O, N-C-N, C-N | O=C-OH     | C <sub>tot</sub> | (CN)=O      | C-N(H,C)    | N <sub>tot</sub> | OH          | O=C-OH     | O=C-OH       | N-C=O       | O <sub>tot</sub> |             |            |            |            |             |             |
| A                              | 324             |                 |            |           |            | 324         |            | 324               |            | 972              | 324         |             | 324              |             |            |              | 324         | 324              |             |            |            |            |             |             |
| D                              |                 | 96              |            |           |            | 96          |            | 96                | 96         | 384              | 96          |             | 96               |             | 96         | 96           | 96          | 288              |             |            |            |            |             |             |
| E                              |                 | 330             |            |           |            | 165         |            | 165               | 165        | 825              | 165         |             | 165              |             | 165        | 165          | 165         | 495              |             |            |            |            |             |             |
| F                              |                 | 45              | 225        | 45        |            | 45          |            | 45                |            | 405              | 45          |             | 45               |             |            |              | 45          | 45               |             |            |            |            |             |             |
| G                              |                 |                 |            |           |            | 1056        |            | 1056              |            | 2112             | 1056        |             | 1056             |             |            |              | 1056        | 1056             |             |            |            |            |             |             |
| H                              |                 | 6               |            |           |            | 18          |            | 12                |            | 36               | 6           | 12          | 18               |             |            |              | 6           | 6                |             |            |            |            |             |             |
| I                              |                 | 66              | 33         | 33        |            | 33          |            | 33                |            | 198              | 33          |             | 33               |             |            |              | 33          | 33               |             |            |            |            |             |             |
| K                              |                 |                 | 351        |           |            | 234         |            | 117               |            | 702              | 117         | 117         | 234              |             |            |              | 117         | 117              |             |            |            |            |             |             |
| L                              |                 | 168             | 84         | 84        |            | 84          |            | 84                |            | 504              | 84          |             | 84               |             |            |              | 84          | 84               |             |            |            |            |             |             |
| M                              |                 | 33              |            |           |            | 33          | 66         | 33                |            | 165              | 33          |             | 33               |             |            |              | 33          | 33               |             |            |            |            |             |             |
| N                              |                 | 36              |            |           |            | 36          |            | 72                |            | 144              | 72          |             | 72               |             |            |              | 72          | 72               |             |            |            |            |             |             |
| P                              |                 | 1200            |            |           |            | 1200        |            | 600               |            | 3000             | 600         |             | 600              |             |            |              | 600         | 600              |             |            |            |            |             |             |
| HYP                            |                 | 87              |            |           |            | 87          | 174        | 87                |            | 435              | 87          |             | 87               | 87          |            |              | 87          | 174              |             |            |            |            |             |             |
| Q                              |                 | 246             |            |           |            | 123         |            | 246               |            | 615              | 246         |             | 246              |             |            |              | 246         | 246              |             |            |            |            |             |             |
| R                              |                 | 324             |            |           |            | 324         |            | 324               |            | 972              | 162         | 486         | 648              |             |            |              | 162         | 162              |             |            |            |            |             |             |
| S                              |                 |                 |            |           |            | 87          | 87         | 87                |            | 261              | 87          |             | 87               | 87          |            |              | 87          | 174              |             |            |            |            |             |             |
| T                              |                 | 63              |            |           |            | 63          | 63         | 63                |            | 252              | 63          |             | 63               | 63          |            |              | 63          | 126              |             |            |            |            |             |             |
| V                              |                 | 114             |            |           |            | 57          |            | 57                |            | 285              | 57          |             | 57               |             |            |              | 57          | 57               |             |            |            |            |             |             |
| Y                              |                 |                 | 6          | 24        | 6          | 6           | 6          | 6                 |            | 54               | 6           |             | 6                | 6           |            |              | 6           | 12               |             |            |            |            |             |             |
| <b>SUM</b>                     | <b>735</b>      | <b>2877</b>     | <b>423</b> | <b>51</b> | <b>243</b> | <b>4158</b> | <b>66</b>  | <b>3507</b>       | <b>261</b> | <b>12321</b>     | <b>3339</b> | <b>615</b>  | <b>3954</b>      | <b>243</b>  | <b>261</b> | <b>261</b>   | <b>3339</b> | <b>4104</b>      |             |            |            |            |             |             |
| subtraction of chemical ending |                 |                 |            |           |            |             |            |                   |            |                  |             |             |                  |             |            |              |             |                  |             |            |            |            |             |             |
|                                |                 |                 |            |           |            |             |            |                   |            |                  |             |             |                  |             |            |              |             |                  |             |            |            |            |             |             |
|                                |                 |                 |            |           |            |             |            |                   |            |                  |             |             |                  |             |            |              |             |                  |             |            |            |            |             |             |
| <b>TOTAL</b>                   |                 |                 |            |           |            |             | <b>735</b> | <b>2877</b>       | <b>423</b> | <b>51</b>        | <b>243</b>  | <b>4158</b> | <b>66</b>        | <b>3504</b> | <b>264</b> | <b>12321</b> | <b>3336</b> | <b>618</b>       | <b>3954</b> | <b>243</b> | <b>264</b> | <b>264</b> | <b>3336</b> | <b>4107</b> |

## S2.2. FACIT type IX collagen

**Table S7.** Elemental composition of type IX collagen, computed from amino acid amounts and composition.

| amino acids                                            | AMINO ACID |    |   |   |   | ALPHA CHAIN 1 |             |              |             |             | per ALPHA CHAIN 2 |            |             |              |            | per ALPHA CHAIN 3 |           |            |             |              | TROPOCOLLAGEN |             |           |             |              |               |             |           |
|--------------------------------------------------------|------------|----|---|---|---|---------------|-------------|--------------|-------------|-------------|-------------------|------------|-------------|--------------|------------|-------------------|-----------|------------|-------------|--------------|---------------|-------------|-----------|-------------|--------------|---------------|-------------|-----------|
|                                                        | C          | H  | N | O | S | qties         | C           | H            | N           | O           | S                 | qties      | C           | H            | N          | O                 | S         | qties      | C           | H            | N             | O           | S         | C           | H            | N             | O           | S         |
| A                                                      | 3          | 7  | 1 | 2 |   | 47            | 141         | 329          | 47          | 94          | 0                 | 42         | 126         | 294          | 42         | 84                | 0         | 45         | 135         | 315          | 45            | 90          | 0         | 402         | 938          | 134           | 268         | 0         |
| C                                                      | 3          | 7  | 1 | 2 | 1 | 11            | 33          | 77           | 11          | 22          | 11                | 4          | 12          | 28           | 4          | 8                 | 4         | 6          | 18          | 42           | 6             | 12          | 6         | 63          | 147          | 21            | 42          | 21        |
| D                                                      | 4          | 7  | 1 | 4 |   | 39            | 156         | 273          | 39          | 156         | 0                 | 24         | 96          | 168          | 24         | 96                | 0         | 28         | 112         | 196          | 28            | 112         | 0         | 364         | 637          | 91            | 364         | 0         |
| E                                                      | 5          | 9  | 1 | 4 |   | 47            | 235         | 423          | 47          | 188         | 0                 | 31         | 155         | 279          | 31         | 124               | 0         | 32         | 160         | 288          | 32            | 128         | 0         | 550         | 990          | 110           | 440         | 0         |
| F                                                      | 9          | 11 | 1 | 2 |   | 22            | 198         | 242          | 22          | 44          | 0                 | 4          | 36          | 44           | 4          | 8                 | 0         | 4          | 36          | 44           | 4             | 8           | 0         | 270         | 330          | 30            | 60          | 0         |
| G                                                      | 2          | 5  | 1 | 2 |   | 217           | 434         | 1085         | 217         | 434         | 0                 | 203        | 406         | 1015         | 203        | 406               | 0         | 210        | 420         | 1050         | 210           | 420         | 0         | 1260        | 3150         | 630           | 1260        | 0         |
| H                                                      | 6          | 9  | 3 | 2 |   | 8             | 48          | 72           | 24          | 16          | 0                 | 8          | 48          | 72           | 24         | 16                | 0         | 4          | 24          | 36           | 12            | 8           | 0         | 120         | 180          | 60            | 40          | 0         |
| I                                                      | 6          | 13 | 1 | 2 |   | 36            | 216         | 468          | 36          | 72          | 0                 | 23         | 138         | 299          | 23         | 46                | 0         | 14         | 84          | 182          | 14            | 28          | 0         | 438         | 949          | 73            | 146         | 0         |
| K                                                      | 6          | 14 | 2 | 2 |   | 42            | 252         | 588          | 84          | 84          | 0                 | 38         | 228         | 532          | 76         | 76                | 0         | 29         | 174         | 406          | 58            | 58          | 0         | 654         | 1526         | 218           | 218         | 0         |
| L                                                      | 6          | 13 | 1 | 2 |   | 57            | 342         | 743          | 57          | 114         | 0                 | 28         | 168         | 364          | 28         | 56                | 0         | 49         | 294         | 637          | 49            | 98          | 0         | 804         | 1742         | 134           | 268         | 0         |
| M                                                      | 5          | 11 | 1 | 2 | 1 | 12            | 60          | 132          | 12          | 24          | 12                | 11         | 55          | 121          | 11         | 22                | 11        | 6          | 30          | 66           | 6             | 12          | 6         | 145         | 319          | 29            | 58          | 29        |
| N                                                      | 4          | 8  | 2 | 3 |   | 20            | 80          | 160          | 40          | 60          | 0                 | 6          | 24          | 48           | 12         | 18                | 0         | 5          | 20          | 40           | 10            | 15          | 0         | 124         | 248          | 62            | 93          | 0         |
| P                                                      | 5          | 9  | 1 | 2 |   | 153           | 765         | 1377         | 153         | 306         | 0                 | 138        | 690         | 1242         | 138        | 276               | 0         | 137        | 685         | 1233         | 137           | 274         | 0         | 2140        | 3852         | 428           | 856         | 0         |
| Q                                                      | 5          | 10 | 2 | 3 |   | 39            | 195         | 390          | 78          | 117         | 0                 | 34         | 170         | 340          | 68         | 102               | 0         | 25         | 125         | 250          | 30            | 75          | 0         | 490         | 980          | 190           | 294         | 0         |
| R                                                      | 6          | 14 | 4 | 2 |   | 54            | 324         | 756          | 216         | 108         | 0                 | 27         | 162         | 378          | 108        | 54                | 0         | 32         | 192         | 448          | 128           | 64          | 0         | 678         | 1582         | 452           | 226         | 0         |
| S                                                      | 3          | 7  | 1 | 3 |   | 42            | 126         | 294          | 42          | 126         | 0                 | 18         | 54          | 126          | 18         | 54                | 0         | 25         | 75          | 175          | 25            | 75          | 0         | 255         | 595          | 85            | 255         | 0         |
| T                                                      | 4          | 9  | 1 | 3 |   | 26            | 104         | 234          | 26          | 78          | 0                 | 15         | 60          | 135          | 15         | 45                | 0         | 11         | 44          | 99           | 11            | 33          | 0         | 208         | 468          | 52            | 156         | 0         |
| V                                                      | 5          | 11 | 1 | 2 |   | 37            | 185         | 407          | 37          | 74          | 0                 | 29         | 145         | 319          | 29         | 58                | 0         | 20         | 100         | 220          | 20            | 40          | 0         | 430         | 946          | 86            | 172         | 0         |
| W                                                      | 11         | 22 | 2 | 2 |   | 6             | 66          | 72           | 12          | 12          | 0                 | 6          | 66          | 72           | 12         | 12                | 0         | 1          | 6           | 12           | 2             | 2           | 0         | 66          | 72           | 12            | 12          | 0         |
| Y                                                      | 5          | 11 | 1 | 3 |   | 6             | 54          | 66           | 6           | 18          | 0                 | 6          | 54          | 66           | 6          | 18                | 0         | 2          | 18          | 22           | 2             | 6           | 0         | 126         | 154          | 14            | 42          | 0         |
| <b>TOTAL</b>                                           |            |    |   |   |   | <b>921</b>    | <b>4014</b> | <b>8186</b>  | <b>1206</b> | <b>2147</b> | <b>23</b>         | <b>689</b> | <b>2827</b> | <b>5870</b>  | <b>864</b> | <b>1567</b>       | <b>15</b> | <b>684</b> | <b>2746</b> | <b>5749</b>  | <b>847</b>    | <b>1556</b> | <b>12</b> | <b>9587</b> | <b>19805</b> | <b>2917</b>   | <b>5270</b> | <b>50</b> |
| H <sub>2</sub> O removed during peptide bond formation |            |    |   |   |   | 920           |             | 1840         |             | 920         |                   | 688        |             | 1376         |            | 688               |           | 683        |             | 1366         |               | 683         |           |             |              |               |             |           |
| total number of each element                           |            |    |   |   |   | 4014          | 6346        | 1206         | 1227        | 23          |                   | 2827       | 4494        | 864          | 879        | 15                |           | 2746       | 4383        | 847          | 873           | 12          | 9587      | 19805       | 2917         | 5270          | 50          |           |
| molar mass of each element (g/mol)                     |            |    |   |   |   | 12.01         | 1.01        | 14.01        | 16.00       | 32.06       |                   | 12.01      | 1.01        | 14.01        | 16.00      | 32.06             |           | 12.01      | 1.01        | 14.01        | 16.00         | 32.06       | 12.01     | 1.01        | 14.01        | 16.00         | 32.06       |           |
| <b>M<sub>w</sub> (g/mol)</b>                           |            |    |   |   |   |               |             | <b>91870</b> |             |             |                   |            |             | <b>65131</b> |            |                   |           |            |             | <b>63616</b> |               |             |           |             |              | <b>261889</b> |             |           |

**Table S8.** Chemical functions in type IX collagen computed from composition (Uniprot) and pooled according to the expected contribution in XPS peaks: C 1s, O 1s and N1s.

| amino acids                     | TROPOCOLLAGEN   |                 |            |           |            |             |           |                   |            |                  |             |            |                  |            |            |            |             |                  |     |
|---------------------------------|-----------------|-----------------|------------|-----------|------------|-------------|-----------|-------------------|------------|------------------|-------------|------------|------------------|------------|------------|------------|-------------|------------------|-----|
|                                 | SH <sub>1</sub> | SH <sub>2</sub> | CH         | CC        | ξ-O        | ξ-N         | ξ-S       | N-C=O, N-C-N, C-N | O=C-OH     | C <sub>alk</sub> | (C)N=O      | C-N(H,C)   | N <sub>alk</sub> | OH         | O=C-OH     | O-C-OH     | N-C-O       | O <sub>alk</sub> |     |
| A                               | 134             |                 |            |           |            | 134         |           | 134               |            | 402              | 134         |            | 134              |            |            |            |             | 134              | 134 |
| C                               |                 |                 |            |           |            | 21          | 21        |                   | 21         | 63               |             | 21         | 21               |            | 21         | 21         |             |                  | 42  |
| D                               |                 | 91              |            |           |            | 91          |           | 91                | 91         | 364              | 91          |            | 91               |            | 91         | 91         |             |                  | 273 |
| E                               |                 | 220             |            |           |            | 110         |           | 110               | 110        | 550              | 110         |            | 110              |            | 110        | 110        |             |                  | 330 |
| F                               |                 | 30              | 150        | 30        |            | 30          |           | 30                | 30         | 270              | 30          |            | 30               |            | 30         | 30         |             |                  | 30  |
| G                               |                 |                 |            |           |            | 630         |           | 630               | 630        | 1260             | 630         |            | 630              |            | 630        | 630        |             |                  | 630 |
| H                               |                 | 20              |            |           |            | 60          |           | 60                | 60         | 120              | 20          | 40         | 60               |            | 60         | 60         |             |                  | 20  |
| I                               | 146             | 73              | 73         |           |            | 73          |           | 73                | 73         | 438              | 73          |            | 73               |            | 73         | 73         |             |                  | 73  |
| K                               |                 | 327             |            |           |            | 218         |           | 218               | 218        | 654              | 218         |            | 218              |            | 218        | 218        |             |                  | 218 |
| L                               | 268             | 134             | 134        |           |            | 134         |           | 134               | 134        | 804              | 134         |            | 134              |            | 134        | 134        |             |                  | 134 |
| M                               |                 | 29              |            |           |            | 29          | 58        | 29                | 29         | 145              | 29          |            | 29               |            | 29         | 29         |             |                  | 29  |
| N                               |                 | 31              |            |           |            | 31          |           | 31                | 31         | 124              | 31          |            | 31               |            | 31         | 31         |             |                  | 31  |
| P                               |                 | 856             |            |           |            | 856         |           | 856               | 428        | 2140             | 428         |            | 428              |            | 428        | 428        |             |                  | 428 |
| Q                               |                 | 196             |            |           |            | 98          |           | 98                | 196        | 490              | 196         |            | 196              |            | 196        | 196        |             |                  | 196 |
| R                               |                 | 226             |            |           |            | 226         |           | 226               | 226        | 678              | 226         | 338        | 452              |            | 452        | 452        |             |                  | 113 |
| S                               |                 |                 |            |           |            | 85          | 85        | 85                | 85         | 255              | 85          |            | 85               | 85         | 85         | 85         |             |                  | 85  |
| T                               | 52              |                 |            |           |            | 52          |           | 52                | 52         | 208              | 52          |            | 52               | 52         | 52         | 52         |             |                  | 52  |
| V                               | 172             |                 |            | 86        |            | 86          |           | 86                | 86         | 430              | 86          |            | 86               |            | 86         | 86         |             |                  | 86  |
| W                               |                 | 6               | 24         | 12        |            | 18          |           | 18                | 6          | 66               |             | 12         | 12               |            | 6          | 6          |             |                  | 12  |
| Y                               |                 | 14              | 56         | 14        | 14         | 14          |           | 14                | 14         | 126              | 14          |            | 14               | 14         | 14         | 14         |             |                  | 14  |
| <b>SUM</b>                      | <b>772</b>      | <b>2253</b>     | <b>523</b> | <b>56</b> | <b>151</b> | <b>2996</b> | <b>79</b> | <b>2529</b>       | <b>228</b> | <b>9587</b>      | <b>2396</b> | <b>521</b> | <b>2917</b>      | <b>151</b> | <b>231</b> | <b>231</b> | <b>2393</b> | <b>3006</b>      |     |
| substraction of chemical ending |                 |                 |            |           |            |             |           |                   | -3         | 3                | 0           | -3         | 0                |            | 3          | 3          |             |                  | 3   |
| <b>TOTAL</b>                    | <b>772</b>      | <b>2253</b>     | <b>523</b> | <b>56</b> | <b>151</b> | <b>2996</b> | <b>79</b> | <b>2526</b>       | <b>231</b> | <b>9587</b>      | <b>2393</b> | <b>524</b> | <b>2917</b>      | <b>151</b> | <b>231</b> | <b>231</b> | <b>2393</b> | <b>3006</b>      |     |

## S2.3. Aggrecan

**Table S9.** Elemental composition of aggrecan.

| molecules                           | quantities | C            | H              | N           | O            | S           |
|-------------------------------------|------------|--------------|----------------|-------------|--------------|-------------|
| CS                                  | 100        | 58800        | 88200          | 4200        | 58800        | 4200        |
| KS                                  | 50         | 7000         | 11500          | 500         | 7000         | 500         |
| PC                                  | 1          | 11374        | 17633          | 2979        | 3982         | 47          |
| <b>total number of each element</b> |            | <b>77174</b> | <b>117333</b>  | <b>7679</b> | <b>69782</b> | <b>4747</b> |
| molar mass of each element          |            | 12.01        | 1.01           | 14.01       | 16.00        | 32.06       |
| <b>M<sub>w</sub> (g/mol)</b>        |            |              | <b>2421399</b> |             |              |             |

## S2.3.1. Sulphated GAG

**Table S10.** Elemental composition of sulphated GAG.

| molecules                    | quantities | C              | H     | N     | O     | S     |
|------------------------------|------------|----------------|-------|-------|-------|-------|
| CS                           | 100        | 58800          | 88200 | 4200  | 58800 | 4200  |
| KS                           | 50         | 7000           | 11500 | 500   | 7000  | 500   |
| total number of each element |            | 65800          | 99700 | 4700  | 65800 | 4700  |
| molar mass of each element   |            | 12.01          | 1.01  | 14.01 | 16.00 | 32.06 |
| <b>M<sub>w</sub> (g/mol)</b> |            | <b>2160071</b> |       |       |       |       |

**Table S11.** Chemical functions in sulphated GAG (chondroitin sulphate and keratan sulphate) computed from composition and pooled according to the expected contribution in XPS peaks : C 1s, O 1s and N1s.

| GAGs | MOLECULE        |                 |    |     |     |     |     |                   |        |                 |        |          |                 |     |        |        |       |          |                 |     |
|------|-----------------|-----------------|----|-----|-----|-----|-----|-------------------|--------|-----------------|--------|----------|-----------------|-----|--------|--------|-------|----------|-----------------|-----|
|      | CH <sub>3</sub> | CH <sub>2</sub> | CH | CCC | C-O | C-N | C-S | N-C=O, N-C-N, C=N | O=C-OH | C <sub>ox</sub> | (CN)=O | C-N(H,C) | N <sub>ox</sub> | OH  | O=C-OH | O=C-OH | N-C-O | S=O, S-O | O <sub>ox</sub> |     |
| CS   | 42              |                 |    |     | 336 | 42  |     | 126               | 42     | 588             | 42     |          | 42              | 294 | 42     |        | 42    |          | 168             | 588 |
| KS   | 10              |                 |    |     | 80  | 10  |     | 40                | 0      | 140             | 10     |          | 10              | 90  |        |        | 10    |          | 40              | 140 |

## S2.3.2. Core protein

**Table S12.** Elemental composition of collagen, computed from amino acid amounts and compositions.

| amino acids                                                 | quantities  | AMINO ACID |    |   |   |   | CORE PROTEIN  |              |             |             |           |  |
|-------------------------------------------------------------|-------------|------------|----|---|---|---|---------------|--------------|-------------|-------------|-----------|--|
|                                                             |             | C          | H  | N | O | S | C             | H            | N           | O           | S         |  |
| A                                                           | 178         | 3          | 7  | 1 | 2 |   | 534           | 1246         | 178         | 356         |           |  |
| C                                                           | 34          | 3          | 7  | 1 | 2 | 1 | 102           | 238          | 34          | 68          | 34        |  |
| D                                                           | 114         | 4          | 7  | 1 | 4 |   | 456           | 798          | 114         | 456         |           |  |
| E                                                           | 284         | 5          | 9  | 1 | 4 |   | 1420          | 2556         | 284         | 1136        |           |  |
| F                                                           | 68          | 9          | 11 | 1 | 2 |   | 612           | 748          | 68          | 136         |           |  |
| G                                                           | 309         | 2          | 5  | 1 | 2 |   | 618           | 1545         | 309         | 618         |           |  |
| H                                                           | 33          | 6          | 9  | 3 | 2 |   | 198           | 297          | 99          | 66          |           |  |
| I                                                           | 88          | 6          | 13 | 1 | 2 |   | 528           | 1144         | 88          | 176         |           |  |
| K                                                           | 28          | 6          | 14 | 2 | 2 |   | 168           | 392          | 56          | 56          |           |  |
| L                                                           | 195         | 6          | 13 | 1 | 2 |   | 1170          | 2535         | 195         | 390         |           |  |
| M                                                           | 13          | 5          | 11 | 1 | 2 | 1 | 65            | 143          | 13          | 26          | 13        |  |
| N                                                           | 30          | 4          | 8  | 2 | 3 |   | 120           | 240          | 60          | 90          |           |  |
| P                                                           | 231         | 5          | 9  | 1 | 2 |   | 1155          | 2079         | 231         | 462         |           |  |
| Q                                                           | 63          | 5          | 10 | 2 | 3 |   | 315           | 630          | 126         | 189         |           |  |
| R                                                           | 79          | 6          | 14 | 4 | 2 |   | 474           | 1106         | 316         | 158         |           |  |
| S                                                           | 309         | 3          | 7  | 1 | 3 |   | 927           | 2163         | 309         | 927         |           |  |
| T                                                           | 204         | 4          | 9  | 1 | 3 |   | 816           | 1836         | 204         | 612         |           |  |
| V                                                           | 196         | 5          | 11 | 1 | 2 |   | 980           | 2156         | 196         | 392         |           |  |
| W                                                           | 25          | 11         | 12 | 2 | 2 |   | 275           | 300          | 50          | 50          |           |  |
| Y                                                           | 49          | 9          | 11 | 1 | 3 |   | 441           | 539          | 49          | 147         |           |  |
| <b>TOTAL</b>                                                | <b>2530</b> |            |    |   |   |   | <b>11374</b>  | <b>22691</b> | <b>2979</b> | <b>6511</b> | <b>47</b> |  |
| 2529 H <sub>2</sub> O removed during peptide bond formation |             |            |    |   |   |   |               | 5058         |             | 2529        |           |  |
| total number of each element                                |             |            |    |   |   |   | <b>11374</b>  | <b>17633</b> | <b>2979</b> | <b>3982</b> | <b>47</b> |  |
| molar mass of each element (g/mol)                          |             |            |    |   |   |   | 12.01         | 1.01         | 14.01       | 16.00       | 32.06     |  |
| <b>M<sub>w</sub> (g/mol)</b>                                |             |            |    |   |   |   | <b>261325</b> |              |             |             |           |  |

**Table S13.** Chemical functions in core protein computed from composition (Uniprot) and pooled according to the expected contribution in XPS peaks : C 1s, O 1s and N1s.

| CORE PROTEIN                   |                 |                 |      |     |     |      |     |                   |        |                  |        |          |                  |     |        |        |       |                  |
|--------------------------------|-----------------|-----------------|------|-----|-----|------|-----|-------------------|--------|------------------|--------|----------|------------------|-----|--------|--------|-------|------------------|
| amino acids                    | CH <sub>3</sub> | CH <sub>2</sub> | CH   | CCC | ξ-O | ξ-N  | ξ-S | N-ξ=O, N-C-N, C=N | O=ξ-OH | C <sub>tot</sub> | (CN)=O | C-N(H,C) | N <sub>tot</sub> | OH  | Q=C-OH | O=C-QH | N-C-Q | O <sub>tot</sub> |
| A                              | 178             |                 |      |     |     |      | 178 | 178               |        | 534              | 178    |          | 178              | 0   | 0      | 0      | 178   | 178              |
| C                              |                 |                 |      |     |     | 34   | 34  | 34                |        | 102              | 34     |          | 34               | 0   | 0      | 0      | 34    | 34               |
| D                              |                 | 114             |      |     |     | 114  |     | 114               | 114    | 456              | 114    |          | 114              | 0   | 114    | 114    | 114   | 342              |
| E                              |                 | 568             |      |     |     | 284  |     | 284               | 284    | 1420             | 284    |          | 284              | 0   | 284    | 284    | 284   | 852              |
| F                              |                 | 68              | 340  |     | 68  |      | 68  | 68                |        | 612              | 68     |          | 68               | 0   | 0      | 0      | 68    | 68               |
| G                              |                 |                 |      |     |     | 309  |     | 309               |        | 618              | 309    |          | 309              | 0   | 0      | 0      | 309   | 309              |
| H                              |                 | 33              |      |     |     | 99   |     | 66                |        | 198              | 33     | 66       | 99               | 0   | 0      | 0      | 33    | 33               |
| I                              | 176             | 88              | 88   |     |     |      |     | 88                |        | 528              | 88     |          | 88               | 0   | 0      | 0      | 88    | 88               |
| K                              |                 | 84              |      |     |     | 56   |     | 28                |        | 168              | 28     | 28       | 56               | 0   | 0      | 0      | 28    | 28               |
| L                              | 390             | 195             | 195  |     |     | 195  |     | 195               |        | 1170             | 195    |          | 195              | 0   | 0      | 0      | 195   | 195              |
| M                              |                 | 13              |      |     |     | 13   | 26  | 13                |        | 65               | 13     |          | 13               | 0   | 0      | 0      | 13    | 13               |
| N                              |                 | 30              |      |     |     | 30   |     | 60                |        | 120              | 60     |          | 60               | 0   | 0      | 0      | 60    | 60               |
| P                              |                 | 462             |      |     |     | 462  |     | 231               |        | 1155             | 231    |          | 231              | 0   | 0      | 0      | 231   | 231              |
| Q                              |                 | 126             |      |     |     | 63   |     | 126               |        | 315              | 126    |          | 126              | 0   | 0      | 0      | 126   | 126              |
| R                              |                 | 158             |      |     |     | 158  |     | 158               |        | 474              | 79     | 237      | 316              | 0   | 0      | 0      | 79    | 79               |
| S                              |                 |                 |      |     | 309 | 309  |     | 309               |        | 927              | 309    |          | 309              | 309 | 0      | 0      | 309   | 618              |
| T                              | 204             |                 |      |     | 204 | 204  |     | 204               |        | 816              | 204    |          | 204              | 204 | 0      | 0      | 204   | 408              |
| V                              | 392             |                 | 196  |     |     | 196  |     | 196               |        | 980              | 196    |          | 196              | 0   | 0      | 0      | 196   | 196              |
| W                              |                 | 25              | 100  | 50  |     | 75   |     | 25                |        | 275              | 25     | 25       | 50               | 0   | 0      | 0      | 25    | 25               |
| Y                              |                 | 49              | 196  | 49  | 49  | 49   |     | 49                |        | 441              | 49     |          | 49               | 49  | 0      | 0      | 49    | 98               |
| SUM                            | 1340            | 2013            | 1115 | 167 | 562 | 2984 | 60  | 2734              | 398    | 11374            | 2623   | 356      | 2979             | 562 | 398    | 398    | 2623  | 3981             |
| subtraction of chemical ending |                 |                 |      |     |     |      |     |                   |        |                  |        |          |                  |     |        |        |       |                  |
| TOTAL                          | 1340            | 2013            | 1115 | 167 | 562 | 2984 | 60  | 2734              | 399    | 11374            | 2622   | 357      | 2979             | 562 | 399    | 399    | 2622  | 3982             |

**Table S14.** Chemical functions in aggrecan computed from composition and pooled according to the expected contribution in XPS peaks: C 1s, O 1s and N1s.

| AGGREGAN  |                 |                 |      |     |       |      |     |                   |        |                  |        |          |                  |       |        |        |       |          |                  |
|-----------|-----------------|-----------------|------|-----|-------|------|-----|-------------------|--------|------------------|--------|----------|------------------|-------|--------|--------|-------|----------|------------------|
| molecules | CH <sub>3</sub> | CH <sub>2</sub> | CH   | CCC | ξ-O   | ξ-N  | ξ-S | N-ξ=O, N-C-N, C=N | O=ξ-OH | C <sub>tot</sub> | (CN)=O | C-N(H,C) | N <sub>tot</sub> | OH    | Q=C-OH | O=C-QH | N-C-Q | S=O, S-Q | O <sub>tot</sub> |
| CS        | 4200            |                 |      |     | 33600 | 4200 |     | 12600             | 4200   | 58800            | 4200   |          | 4200             | 29400 | 4200   | 4200   | 4200  | 16800    | 58800            |
| KS        | 500             |                 |      |     | 4000  | 500  |     | 2000              |        | 7000             | 500    |          | 500              | 4500  |        |        | 500   | 2000     | 7000             |
| PC        | 1340            | 2013            | 1115 | 167 | 562   | 2984 | 60  | 2734              | 399    | 11374            | 2622   | 357      | 2979             | 562   | 399    | 399    | 2622  |          | 3982             |
| TOTAL     | 6040            | 2013            | 1115 | 167 | 38162 | 7684 | 60  | 17334             | 4599   | 77174            | 7322   | 357      | 7679             | 34462 | 4599   | 4599   | 7322  | 18800    | 69782            |

## S2.4. Hyaluronic acid

**Table S15.** Elemental composition of hyaluronic acid.

| HYALURONIC ACID                    | MONOMER |      |       |       | MOLECULE                     |   |   |   |         |
|------------------------------------|---------|------|-------|-------|------------------------------|---|---|---|---------|
|                                    | C       | H    | N     | O     | degree of polymerization     |   |   |   |         |
|                                    | 14      | 21   | 1     | 11    | 10000                        | C | H | N | O       |
| molar mass of each element (g/mol) | 12.01   | 1.01 | 14.01 | 16.00 | <i>M<sub>w</sub></i> (g/mol) |   |   |   | 3793180 |

**Table S16.** Chemical functions in hyaluronic acid computed from composition and pooled according to the expected contribution in XPS peaks: C 1s, O 1s and N1s.

| HYALURONIC ACID |                 |                 |    |     |       |       |     |                   |        |                  |        |          |                  |       |        |        |       |          |                  |
|-----------------|-----------------|-----------------|----|-----|-------|-------|-----|-------------------|--------|------------------|--------|----------|------------------|-------|--------|--------|-------|----------|------------------|
| GAG             | CH <sub>3</sub> | CH <sub>2</sub> | CH | CCC | ξ-O   | ξ-N   | ξ-S | N-ξ=O, N-C-N, C=N | O=ξ-OH | C <sub>tot</sub> | (CN)=O | C-N(H,C) | N <sub>tot</sub> | OH    | Q=C-OH | O=C-QH | N-C-Q | S=O, S-Q | O <sub>tot</sub> |
| HA              | 10000           |                 |    |     | 80000 | 10000 |     | 30000             | 10000  | 140000           | 10000  |          | 10000            | 80000 | 10000  | 10000  | 10000 |          | 110000           |



### S3. Molar concentration ratios computed on the basis of amino acid amount and composition of ECM main compounds

**Table S17.** Expected molar concentration ratios from XPS computed on the basis of amino acid amount and composition of type II collagen, aggrecan and hyaluronic acid.

| COMPONENT | C/N<br>$\alpha$ | C <sub>ox</sub> /N<br>$\beta$ | C <sub>284.8</sub> /N<br>$\delta$ | C <sub>287.5</sub> /N<br>- | C <sub>286.1</sub> /C<br>$\gamma_x$ | C/S <sub>ox</sub><br>$\eta$ |
|-----------|-----------------|-------------------------------|-----------------------------------|----------------------------|-------------------------------------|-----------------------------|
| Col       | 3.12            | 2.08                          | 1.03                              | 0.89                       | 0.36                                | -                           |
| Agg       | -               | -                             | -                                 | 2.26                       | 0.59                                | 16.42                       |
| HA        | -               | -                             | -                                 | 3.00                       | 0.64                                | -                           |

### S4. OA samples scoring

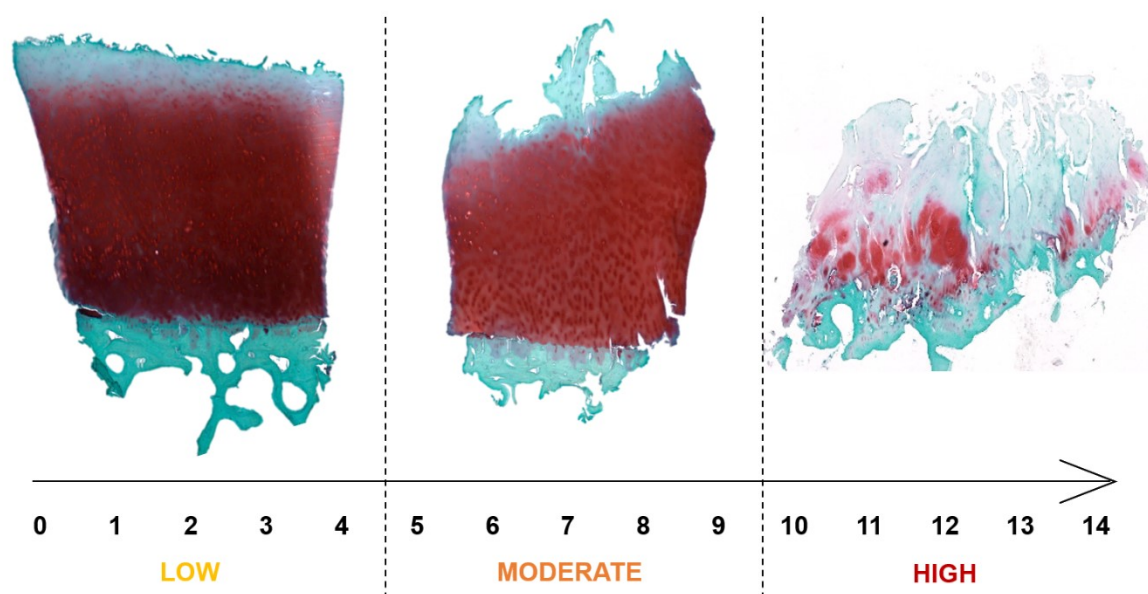

**Figure S1.** Evolution of the osteochondral junction due to OA. Tissues were stained with Safranin O / Fast Green. Degradation of articular cartilage was determined by the Mankin score on stained tissues. OA samples were then classified into groups with increasing OA severity: the group ‘Low’ (score 0 - 4), the group ‘Moderate’ (score 5 - 9) and the group ‘High’ (score 10 - 14).

**S5. AFM data**

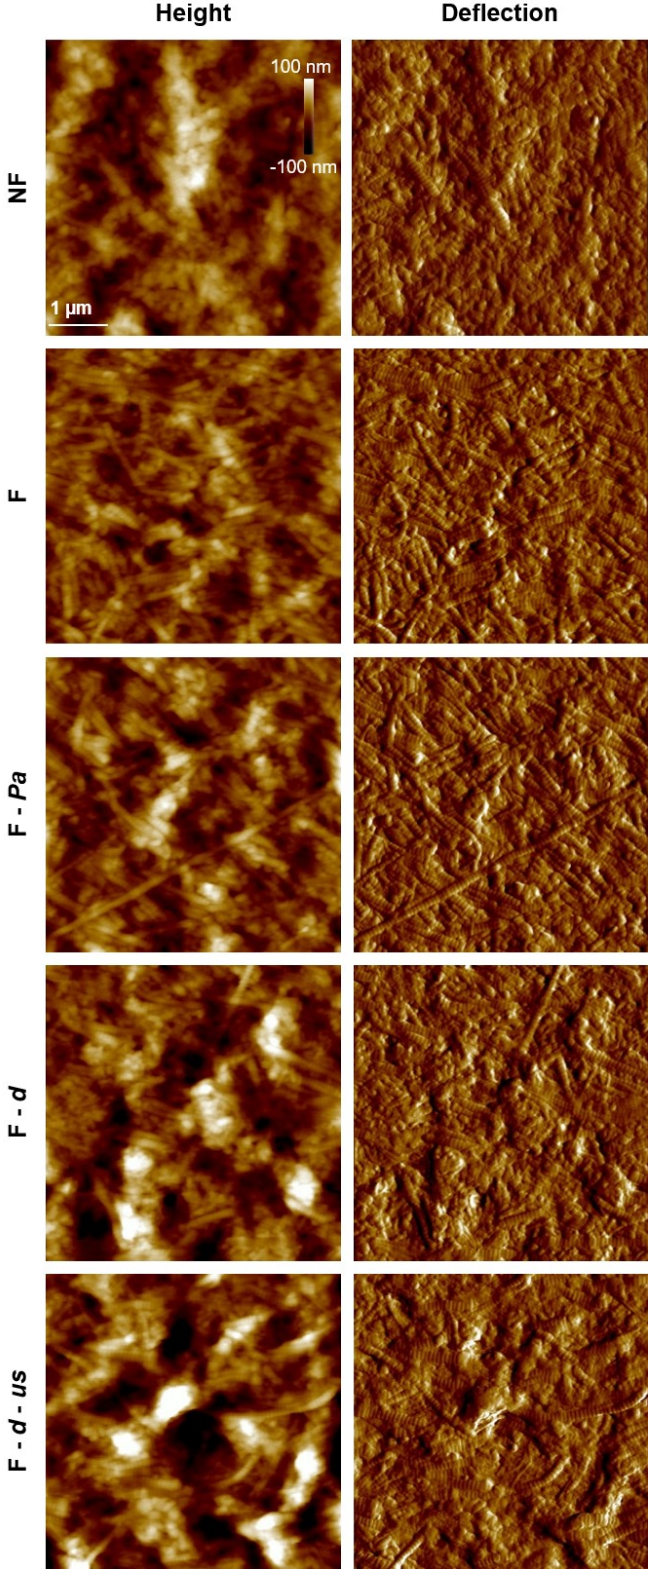

**Figure S2.** AFM height (left) and deflection (right) images recorded on human articular cartilage submitted to different treatments (see Table 1).

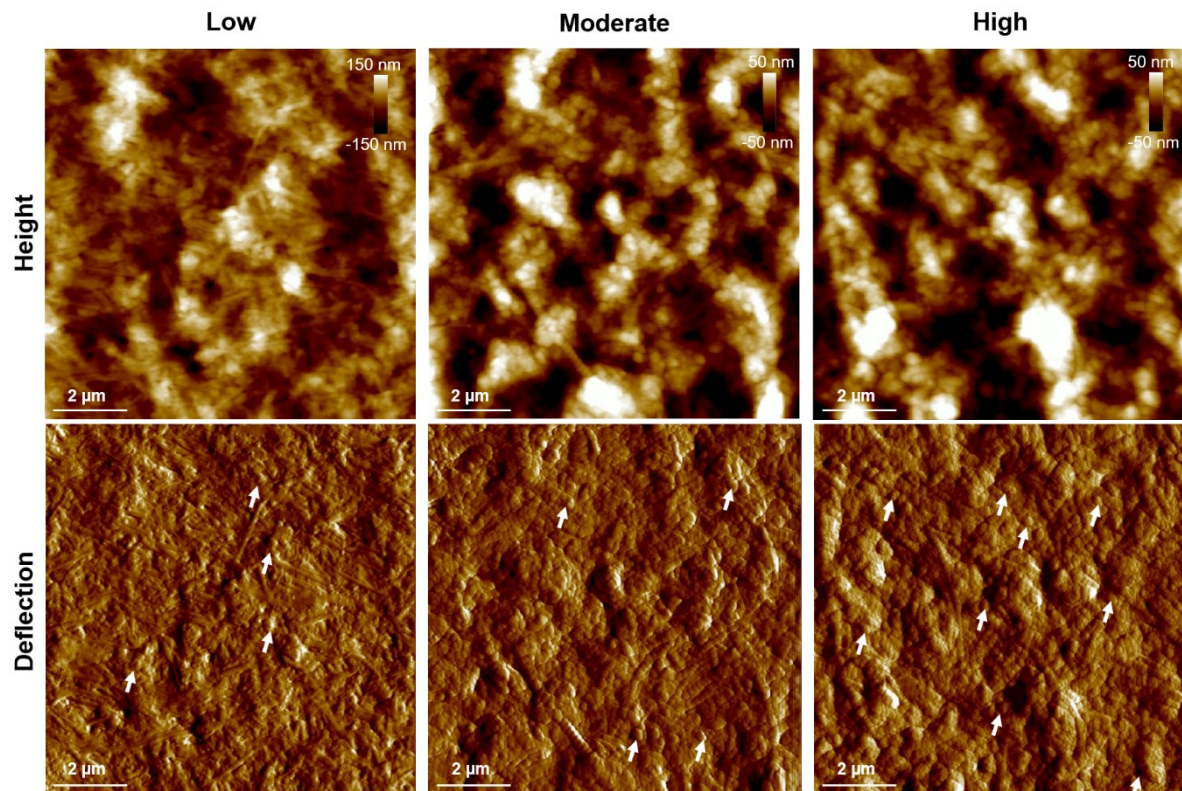

**Figure S3.** AFM height (top) and deflection (bottom) images recorded on OA cartilage ECM at low, moderate and high scores, showing the presence of spheroid-shaped particles (see arrows).



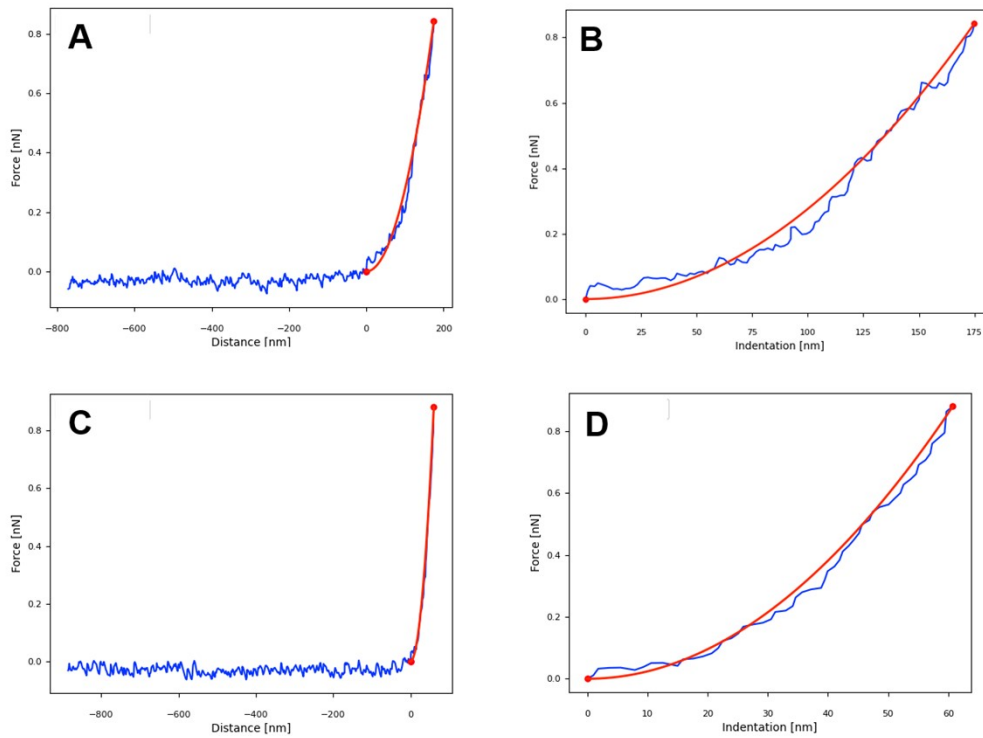

**Figure S4.** Typical (A, C) force-distance and (B, D) force-indentation curves recorded on cartilage ECM showing different stiffness. Experimental approach curves and the corresponding fitting curves, obtained using the Bilodeau model, are shown, respectively, in blue and in red.

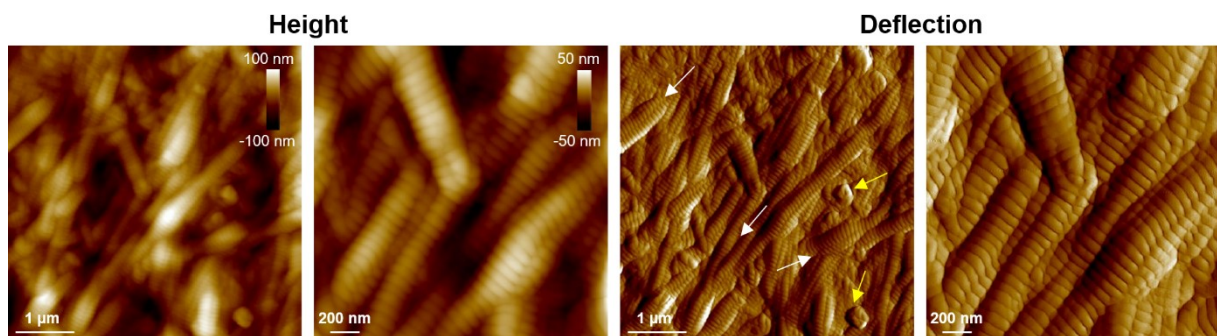

**Figure S5.** AFM height and deflection images (as indicated) recorded on a healthy cartilage after enzymatic hyaluronidase/collagenase treatment. Lateral fusion of collagen fibrils and spheroid-shaped nanostructures are indicated by white and yellow arrows, respectively.

## S6. XPS data

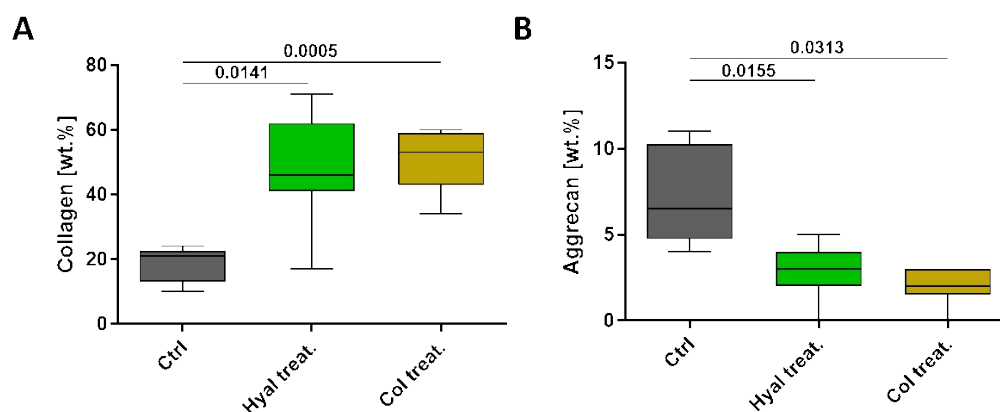

**Figure S6.** Evolution of the weight percentages (wt.%) of (A) collagen and (B) aggrecan prior to and after hyaluronidase (Hyal treat.) and collagenase (Col treat.) treatments.

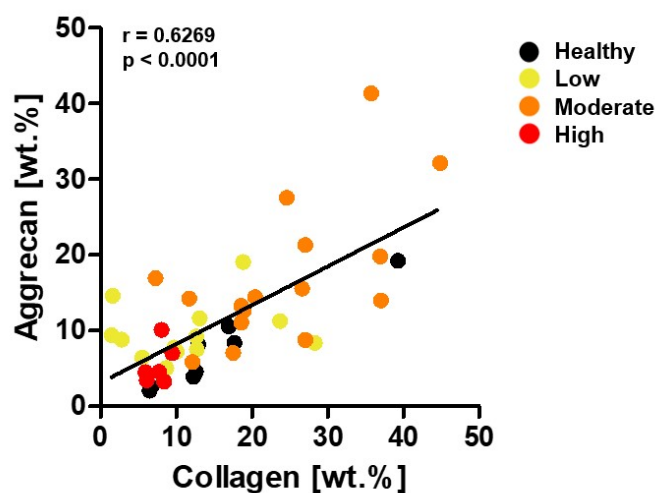

**Figure S7.** Correlation between the amount of collagen and aggrecan with a discrimination by histopathological OA severity. [Spearman correlation of 0.6269 ; p-value < 0.0001].

## S7. Nanomechanical properties

(see

Table

18)

**Table S18.** Nanomechanical properties measured by AFM on cartilage tissues from the literature.[4–9]

| Ref                                              | TISSUE  |              |                                            |                                                            |                        |                                      |                                                    | SCORING     | AFM MODE                                                                          |                                                                    |                                             | RESULTS                                                         |
|--------------------------------------------------|---------|--------------|--------------------------------------------|------------------------------------------------------------|------------------------|--------------------------------------|----------------------------------------------------|-------------|-----------------------------------------------------------------------------------|--------------------------------------------------------------------|---------------------------------------------|-----------------------------------------------------------------|
|                                                  | species | joint        | localisation within joint                  | sample preparation (shape, treatment, storage and cutting) |                        |                                      |                                                    |             | tip                                                                               | parameters                                                         | localisation and direction                  |                                                                 |
| Tang et al.,<br>Soft<br>Materials,<br>2014       | Human   | hip;<br>knee | NI                                         | piece of 2mm <sup>2</sup>                                  | collagen<br>extraction | H <sub>2</sub> O w/<br>2%SDS,<br>4°C | /                                                  | /           | radius < 10nm                                                                     | k = 8 or 42 N.m <sup>-1</sup>                                      | NI : <i>extracted<br/>collagen fibrils</i>  | Stiffening with<br>OA                                           |
| Shao et al.,<br>RSC Adv.,<br>2014                | Human   | knee         | NI                                         | piece of 2mm <sup>2</sup>                                  | /                      | OCT,<br>-24°C                        | sectioned<br>parallelly<br>to surface<br>(5-20 µm) | Outerbridge | nominal tip<br>radius less than<br>7 nm                                           | k=20.36 nN.nm <sup>-1</sup>                                        | cartilage surface;<br>perpendicular         | Stiffening with<br>OA severity                                  |
| Wilusz et<br>al., Osteo.<br>and<br>Cart.,2013    | Human   | knee         | femoral<br>condyle                         | explant (8mm)                                              | /                      | OCT,<br>-20°C                        | sectioned<br>perpendic<br>ularly to<br>surface     | Collin      | microindentatio<br>n, borosilicate<br>glass spheres<br>(5 µm nominal<br>diameter) | k=7.5 N.m <sup>-1</sup> ,<br>v=15 µm.s <sup>-1</sup> ,<br>F=750 nN | cartilage depth;<br>parallel                | Softening with<br>OA severity                                   |
| Wen, Osteo.<br>and Cart.,<br>2012                | Human   | hip;<br>knee | femoral<br>head, lateral<br>plateau tibial | osteocondral<br>plug (5mm)                                 | /                      | OCT,<br>-20°C                        | sectioned<br>parallelly<br>to surface<br>(50 mm)   | Outerbridge | curvature<br>radius of<br>around 10 nm                                            | k = 28–91 N.m <sup>-1</sup>                                        | cartilage different<br>depth, perpendicular | Stiffening with<br>OA severity                                  |
| Stolz et al.,<br>Nat. Nano,<br>2009              | Human   | hip,<br>knee | NI                                         | osteocondral<br>plug (2mm)                                 | /                      | PBS, ice                             | /                                                  | Outerbridge | micro and<br>nano-<br>indentation<br>(30nm and<br>150nm radius)                   | k=0.06 N.m <sup>-1</sup> ,<br>f=3Hz, F=1.8 nN                      | cartilage surface;<br>perpendicular         | Softening with<br>OA severity<br>only with nano-<br>indentation |
| Danalache<br>et al.,<br>Osteo. and<br>Cart.,2019 | Human   | knee         | Femoral<br>chondyle                        | explant                                                    | /                      | OCT                                  | sectioned<br>parallelly<br>to surface<br>(35 µm)   | SCSO        | a polymeric<br>microsphere<br>(25 µm in<br>diameter)                              | k = 7.4 N.m <sup>-1</sup><br>v = 5 µm.s <sup>-1</sup><br>F= 300nN  | cartilage surface;<br>perpendicular         | Softening with<br>OA severity                                   |

## S8. Collagen II/IX/XI heterofibril

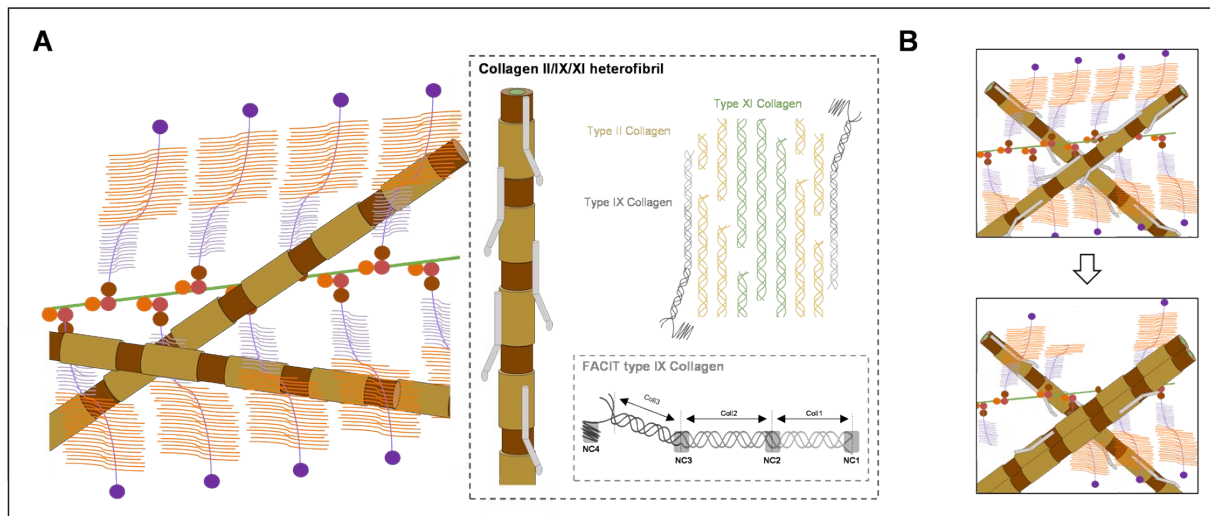

**Scheme S1.** (A) Schematic illustration of the Collagen II/IX/XI hetero-fibril constituents and their organization (Abbreviations. FACIT: Fibril Associated Collagens with Interrupted Triple helixes, COL1/COL2/COL3: triple-helical domains). (B) Schematic illustration of the reorganization in the extracellular matrix of cartilage during osteoarthritis.

## References

- [1] P.G. Rouxhet, M.J. Genet, XPS analysis of bio-organic systems, *Surf. Interface Anal.* 43 (2011).
- [2] S. Tanuma, C.J. Powell, D.R. Penn, Calculations of electron inelastic mean free paths, *Surf. Interface Anal.* 37 (2005) 1–14.
- [3] QUASES, (n.d.). <http://www.quases.com/home/> (accessed April 28, 2021).
- [4] B. Tang, M.K. Fong, C.Y. Wen, C.H. Yan, D. Chan, A.H.W. Ngan, K.Y. Chiu, W.W. Lu, Nanostiffness of Collagen Fibrils Extracted from Osteoarthritic Cartilage Characterized with AFM Nanoindentation, *Soft Mater.* 12 (2014) 253–261.
- [5] J. Shao, L. Lin, B. Tang, C. Du, Structure and nanomechanics of collagen fibrils in articular cartilage at different stages of osteoarthritis, *RSC Adv.* 4 (2014) 51165–51170.
- [6] R.E. Wilusz, S. Zauscher, F. Guilak, Micromechanical mapping of early osteoarthritic changes in the pericellular matrix of human articular cartilage, *Osteoarthritis Cartilage.* 21 (2013) 1895–1903.
- [7] C.-Y. Wen, C.-B. Wu, B. Tang, T. Wang, C.-H. Yan, W.W. Lu, H. Pan, Y. Hu, K.-Y. Chiu, Collagen fibril stiffening in osteoarthritic cartilage of human beings revealed by atomic force microscopy, *Osteoarthritis Cartilage.* 20 (2012) 916–922.
- [8] M. Stolz, R. Gottardi, R. Raiteri, S. Miot, I. Martin, R. Imer, U. Staufer, A. Raducanu, M. Düggelein, W. Baschong, A.U. Daniels, N.F. Friederich, A. Aszodi, U. Aebi, Early detection of aging cartilage and osteoarthritis in mice and patient samples using atomic force microscopy, *Nat. Nanotechnol.* 4 (2009) 186–192.
- [9] M. Danalache, L.F. Jacobi, M. Schwitalle, U.K. Hofmann, Changes in stiffness and biochemical composition of the pericellular matrix as a function of spatial chondrocyte organization in osteoarthritic cartilage, *Osteoarthritis Cartilage.* 27 (2019) 823-832.
